# Supplementary material for: Impact of DBBM Fragments on the Porosity of the Calvarial Bone: A Pilot Study on Mice
Source: MDPI journal article supplement (doi:10.3390/ma13214748), 2020-10-23
Supplement: s1 [file s1]

Supplementary material

# Impact of DBBM Fragments on the Porosity of the Calvarial Bone: A Pilot Study on Mice

Ulrike Kuchler <sup>1</sup>, Patrick Heimel <sup>2,3,4</sup>, Alexandra Stähli <sup>5,6</sup>, Franz Josef Strauss <sup>5,7,8</sup>, Bernadette Luza <sup>2,3</sup> and Reinhard Gruber <sup>5,6,\*</sup>

- <sup>1</sup>. Department of Oral Surgery, University Clinic of Dentistry, Medical University of Vienna, 1090 Vienna, Austria; [ulrike.kuchler@meduniwien.ac.at](mailto:ulrike.kuchler@meduniwien.ac.at)
  - <sup>2</sup>. Core Facility Hard Tissue and Biomaterial Research, Karl Donath Laboratory, University Clinic of Dentistry, Medical University of Vienna, 1090 Vienna, Austria; [patrick.heimel@trauma.lbg.ac.at](mailto:patrick.heimel@trauma.lbg.ac.at) (P.H.); [bernadette.luz@gmx.at](mailto:bernadette.luz@gmx.at) (B.L.)
  - <sup>3</sup>. Ludwig Boltzmann Institute for Clinical and Experimental Traumatology, 1090 Vienna, Austria
  - <sup>4</sup>. Austrian Cluster for Tissue Regeneration, 1090 Vienna, Austria
  - <sup>5</sup>. Department of Oral Biology, University Clinic of Dentistry, Medical University of Vienna, 1090 Vienna, Austria; [franz.strauss@zzm.uzh.ch](mailto:franz.strauss@zzm.uzh.ch)
  - <sup>6</sup>. Department of Periodontology, School of Dental Medicine, University of Bern, 3010 Bern, Switzerland; [alexandra.staehli@zmk.unibe.ch](mailto:alexandra.staehli@zmk.unibe.ch)
  - <sup>7</sup>. Department of Conservative Dentistry, School of Dentistry, 8380544, University of Chile, Santiago, Chile
  - <sup>8</sup>. Clinic of Reconstructive Dentistry, Center of Dental Medicine, University of Zurich, 8032 Zurich, Switzerland.
- \* Correspondence: [reinhard.gruber@meduniwien.ac.at](mailto:reinhard.gruber@meduniwien.ac.at), Tel.: +43-699-107-18-472

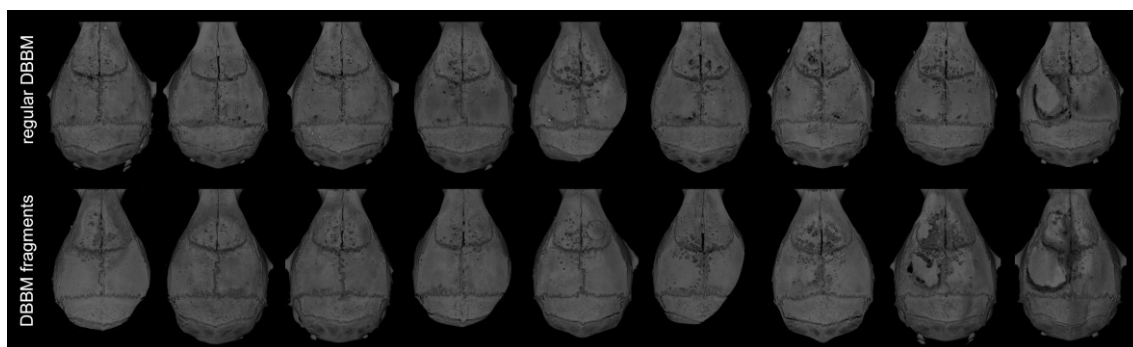

**Figure S1.** All samples overview.
